# Supplementary material for: Interaction of Antibiotics with Innate Host Defense Factors against Salmonella enterica Serotype Newport
Source: PubMed Central journal article supplement (PMC5717323; doi:10.1128/msphere.00410-17), 2017-12-06
Supplement: sph006172421sf1.pdf [file sph006172421sf1.pdf]

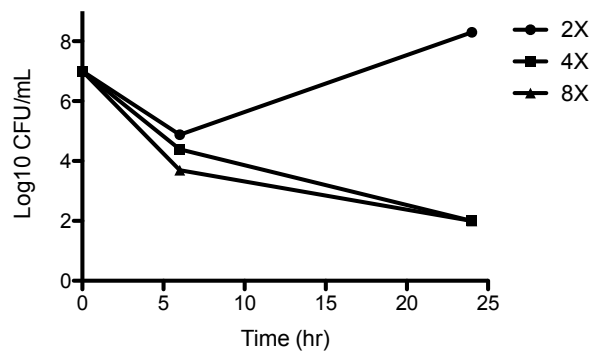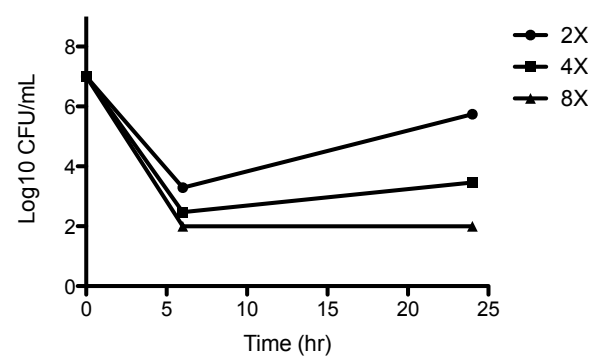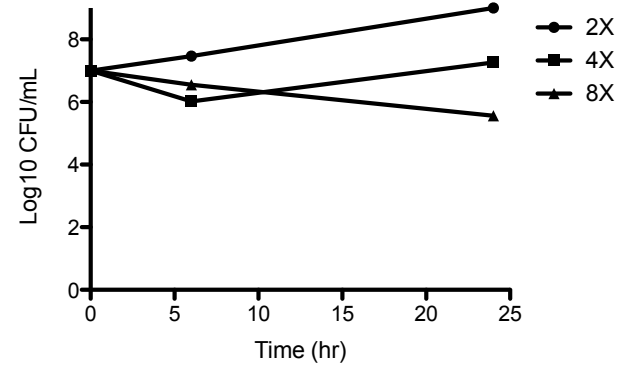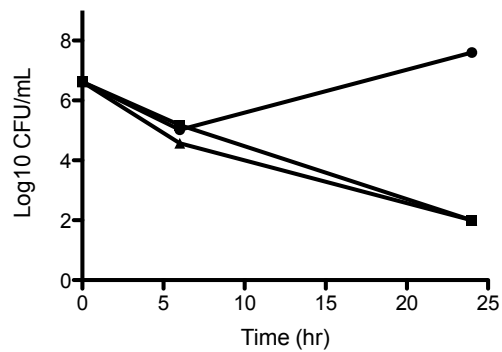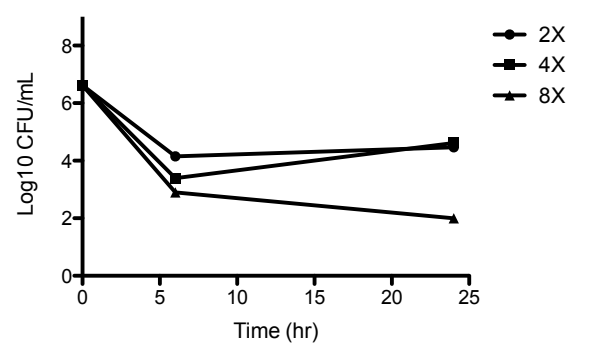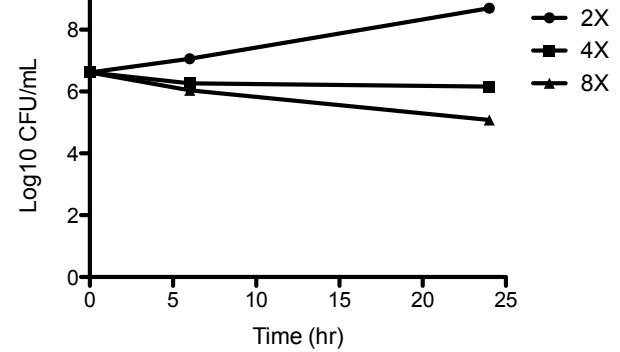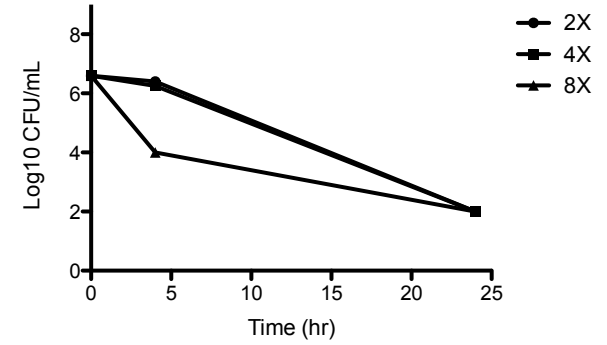

**CEFTRIAXONE**

**CIPROFLOXACIN**

**CHLORAMPHENICOL**

**AZITHROMYCIN**

Figure S1. Kill curves against CSF *Salmonella enterica* strain in MHB (top row) and RPMI+10%LB (bottom row) using various antibiotics at 2X, 4X, and 8X MIC. Azithromycin was assayed only in RPMI+10%LB as it was inactive in MHB.
